# Supplementary material for: Yeast de novo proteins integrate into cellular systems using ancient protein targeting and degradation pathways
Source: PubMed Central journal article supplement — bioRxiv. 2025 Nov 25:2024.08.28.610198. Originally published 2024 Aug 29. Preprint. [Version 4] doi: 10.1101/2024.08.28.610198 (PMC11384008; doi:10.1101/2024.08.28.610198), 2025-11-25
Supplement: NIHPP2024.08.28.610198v1-supplement-1.pdf [file NIHPP2024.08.28.610198v1-supplement-1.pdf]

## Supplemental Figures

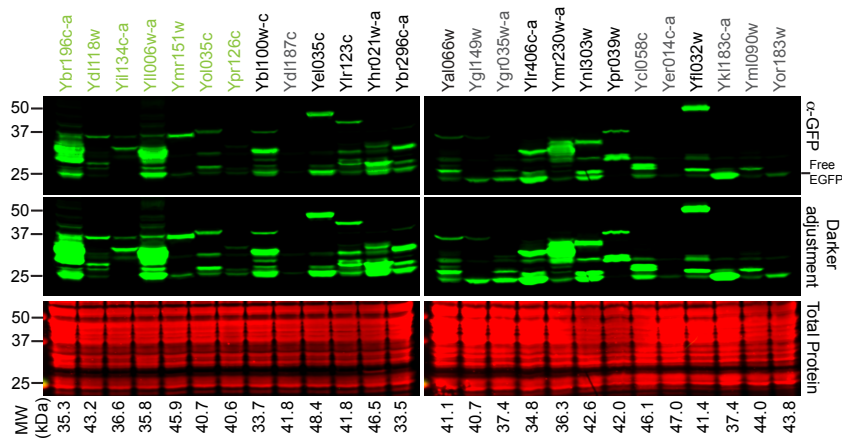

Figure S1. Immunoblot analyses of BEPs.

```
Ybr196c-a
MSRVYIYPLTVFYFFFAIEMSVFCYYNWEYRRNFPYLFRRPIFFLVLIS

Ydl118w
MFESFVNEGTAFLFAKDERIRFKDKYKALPIDVRNAEGNVLHSCRGLSISFKFFHNVAFLSCWLVFKRSKGCNATADVSPPKKPKICDEFLGLVACSVMYAASQIVYLLVPAVLAFAFLI

Yil134c-a
MVGSEFNNTADVVAIVAILLTLNADYEVKQRLVSACFTKRKIKWYFIYAIALLSFLSSRNTVCAPY

Yil006w-a
MTQLSQSNVERVALVYISVYFFSCISLIVYFFTFCLSVSPKNRQHPKIYINNKCP

Ymr151w
MGSVPTVIPGIVHCWMIHCLIGPFLFAIYWSIFEGMFFPQKYLDCQSVINLLCGSNQKRIKFEKLRIVQVHIQEKIGCSKNTLLIYQLGSRHKINRQINDLLCNLCKSNYMIIMLLYAEIIIYSSPFCVLSATIFLRGFLI

Yol035c
MRVYHILVYTYILSAVYSQDLFSPVWVQLSTVKSDIIRPYLHGNSFLQILQVLITAPSTRCKFSQNSIPFIFLALLSQDFHVFLGIELHAEFVS

Ypr126c
MLARVAESVCGLMGQVKTGLLLFDGSGFSDRLGVMRFYVWSSRIYVLVVOAQQLIDAHNGVLFLLFLLHNFFLPQLFOFLSGCLFINDVYFNLMV

Ydl187c
MQVASILQVRPFFPQIHFLLFFCFVFSKRSVASQRGTHFLVRICFEPPLQGRMGKLCRPHLNHLLYCYTAYFNSIWSLVSJKSTRNRVHKYIPYKSTELRSVAN

Yir123c
MIMQKRLNRNSVVKSRNCLARHQHESSISKLHVSLRHLRCLRPVRFDFLHNAGSKVCSQNSCPQLHVGTMALFHTVFLWPHFCGLWTVHEKLYNLLSIEVY

Yhr021w-a
MNRSFHFLIKYIYHVLVLYFYFHKKQAIMPFFIFFSSFDGLSFDLRVVAFLAKHVFVGVCSPPFVGVGGSSRVVTEWLSKLVLPVPPVSVITQVFLSRKRGEFSSGILIINPYKSLRSLDLSFNFNTAKNKSSTFTLNLEDVSK

Yal066w
MLSIVKRSILHSIPITRHILQILVLMNHNQIRNIKLYHFISYGFMLTKLTVFLFNLFYLRILCRLLIILSLPVQIYKEIQTKMLEKHTASDTSICI

Ygl149w
MSINALLYVLSLALLIWTGSWTLLLLLFFCLLELFLSLHFCCFTRHVVHYTLPPKCHSLKFOFDSIPSSLSLSPFFLFFPRLRAVAFASPTLSFFFPFI

Ygr035w-a
MLLYLYLYALKTVSHLFFCNPFCFRNLVSGDMLNPRLSFFFTNHLCPPEALIRGKGSYSAVGNFFSRKK

Yir406c-a
MIQKPIILSSFLYIRALLHSIHPYIRTSVHLYTKKITSYNFLGVPPK

Yni303w
MTTLQIINQVAFSLRQIIQQDSQAAIVQYANVICTNIDALYNPTIYIIVKLFITTYSSMVFLMFCRGKLSCHFYSYDRNPWFDTFYLKTKSIYFGFYIDDECTYKMAFK

Ypr039w
MASFDYLFHPFVPCICPDFLYKSPAFPPSSCLHHPRLFNDAKFCPLFLVFPASFTRWLTFELHLYVYNNKMHHHTYAPHIDLRAALDTTAPQKCKPKETLHRSDHQP

Ycl058c
MQYHSALYVYVYVFTTPIYKEKPDISICFMSLSVDFDFSVRICSRLESFWSLSSSAFKVSAFSLAGSCVLASRSSVGIIVSLLLNFSTCNFVLFSAVLDLFFCTFLPTPTFLPTPFFFMLHLPIFSLNNALELLYLIAGLHI

Yil032w
MRVVRQSGSALSRAKSRKYTSYRVMNVVNLTFSPVLAPYIHYILEEISQWTTREMNTEICFLAKFSLLVFLFYLNFGGFNSVSNITSSSPTYDNNRHYGND

Yki183c-a
MYSKILLYRSNLFMNFVSFVCTIGTLFLVADYVYLAFAFFQSKKEKETKFKHLHYQKRSOFLANIH

Yml090w
MLVFSFLFVWSINLALIFLCKKSWASYLFLYLYNEFFCEDEYKLTKNQVVEAIAPFMMCLGSLGALGKQRTANFLLSYNVINNPVVLVYVYENFSRINFIKHTTKEKSVIWTNERQLNPWICN

Yor183w
MRLHHGEYGTKLIGGKSIDGKLGHPCLSRRRKHLREKEMGPQYVRYMYPKPKAIIRGNPDGINLPDGTGRGLTAATWSRAYHSNYSYLVRPKVVTLSKHRELMITFLLYVLYCYISAFIK
```

Transmembrane Domain Prediction Method: **Phobius** **TMHMM**

**Figure S2. ER BEPs amino acid sequences and predicted TMDs (accompanies Figure 2 and 3).**

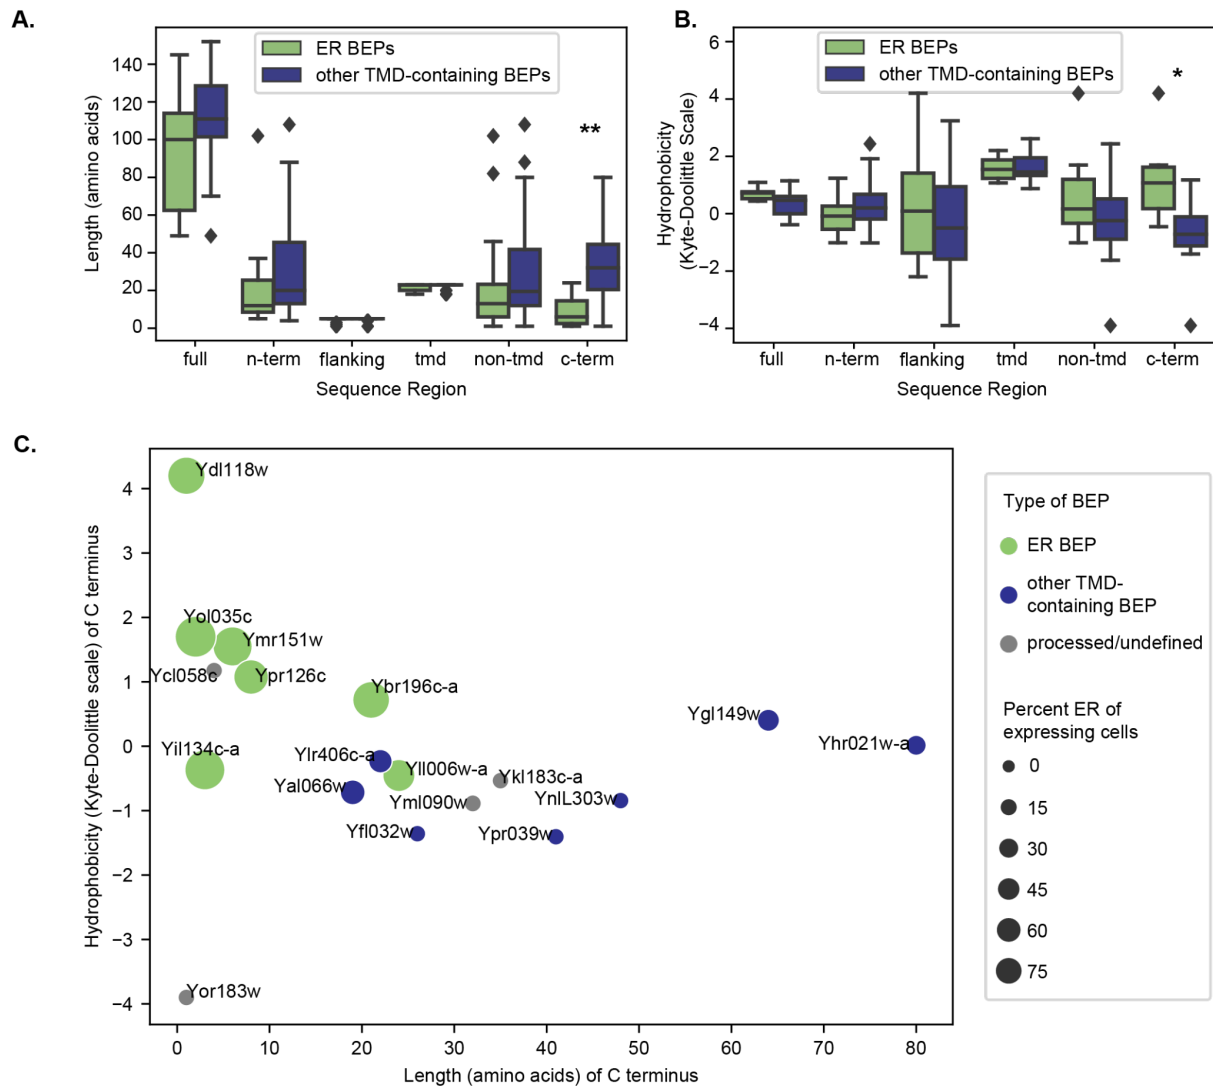

**Figure S3. Sequence analysis of BEP protein sequences using TMHMM reveals ER-localized BEPs have short and hydrophobic C-termini.** (accompanies Figure 3).

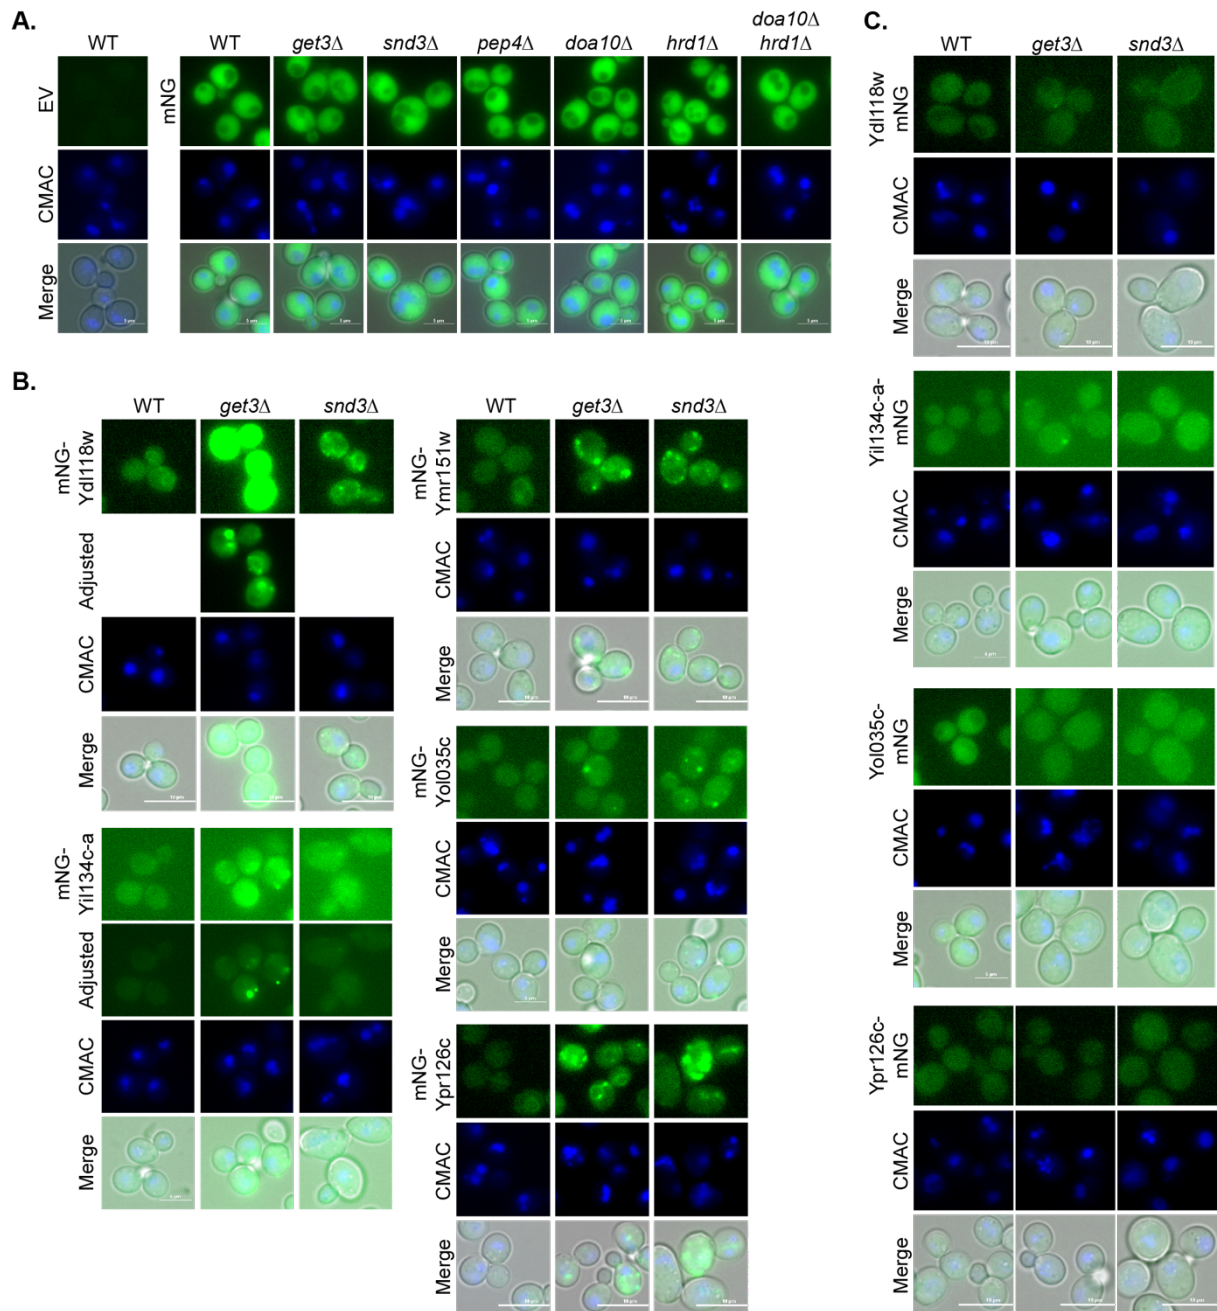

**Figure S4. ER BEP localization in cells lacking functional GET or SND pathways** (accompanies Figure 4).

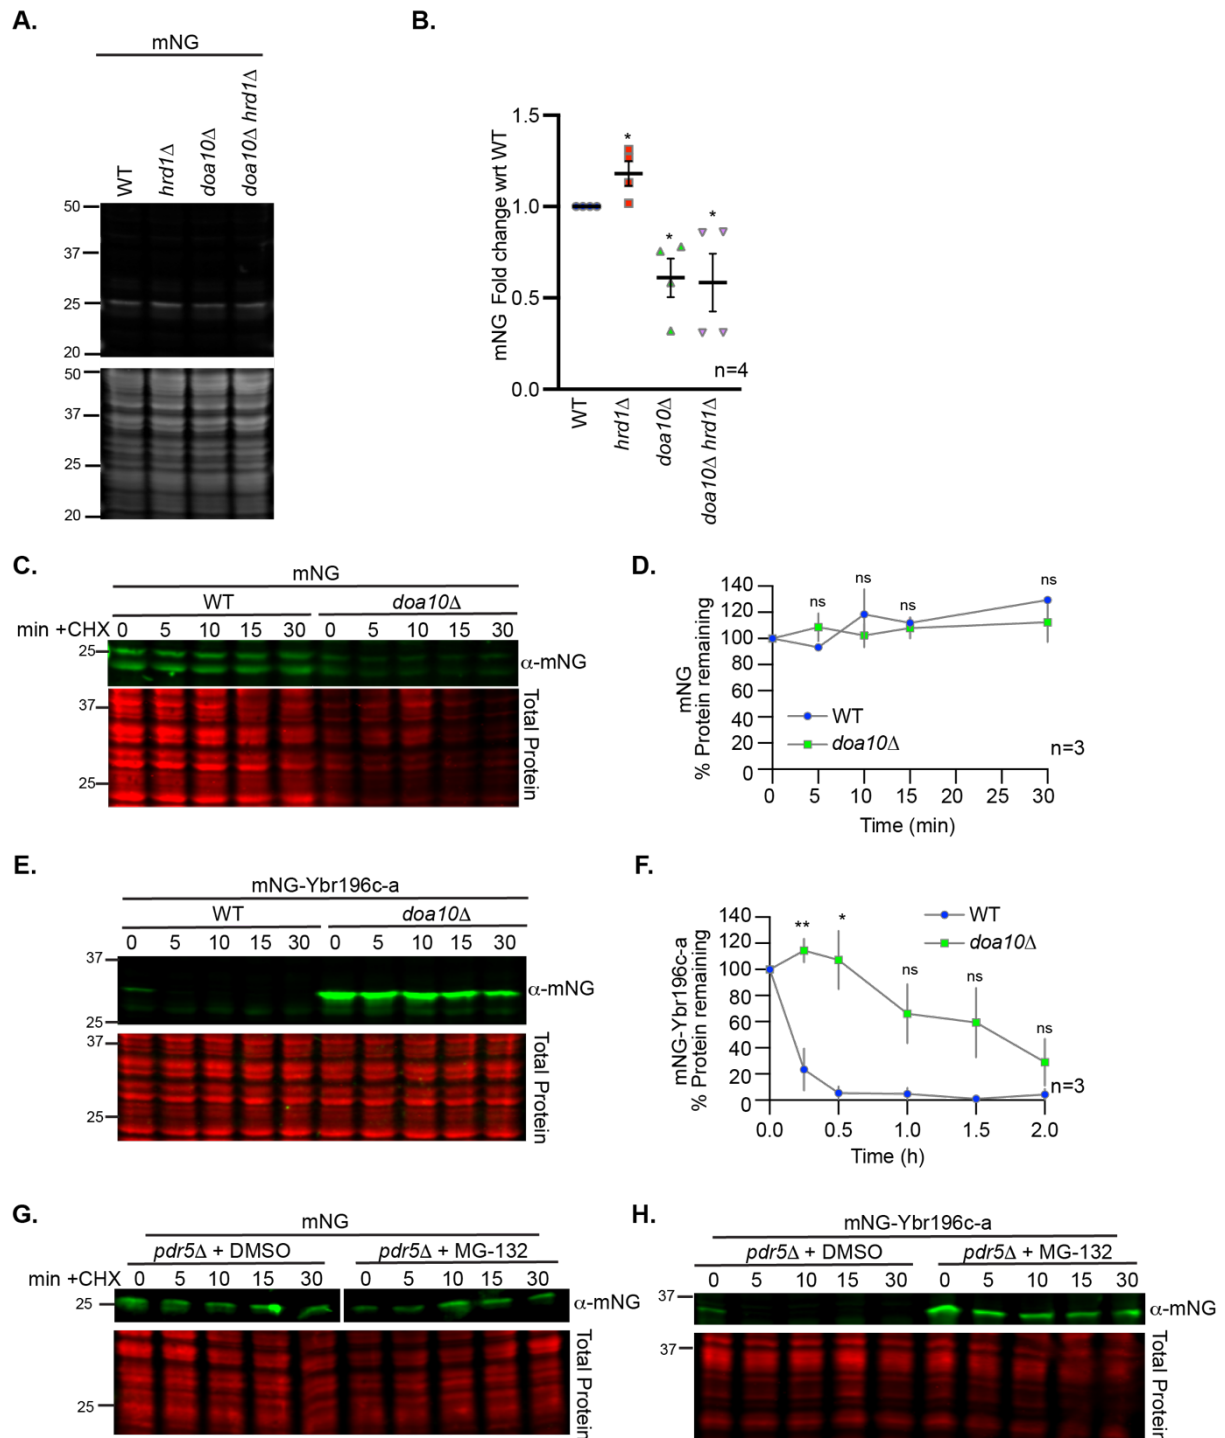

**Figure S5. mNG stability is not dependent upon Doa10 or the proteasome, but N-terminally tagged mNG-Ybr196c-a stability remains dependent on both these factors (accompanies Figure 5).**

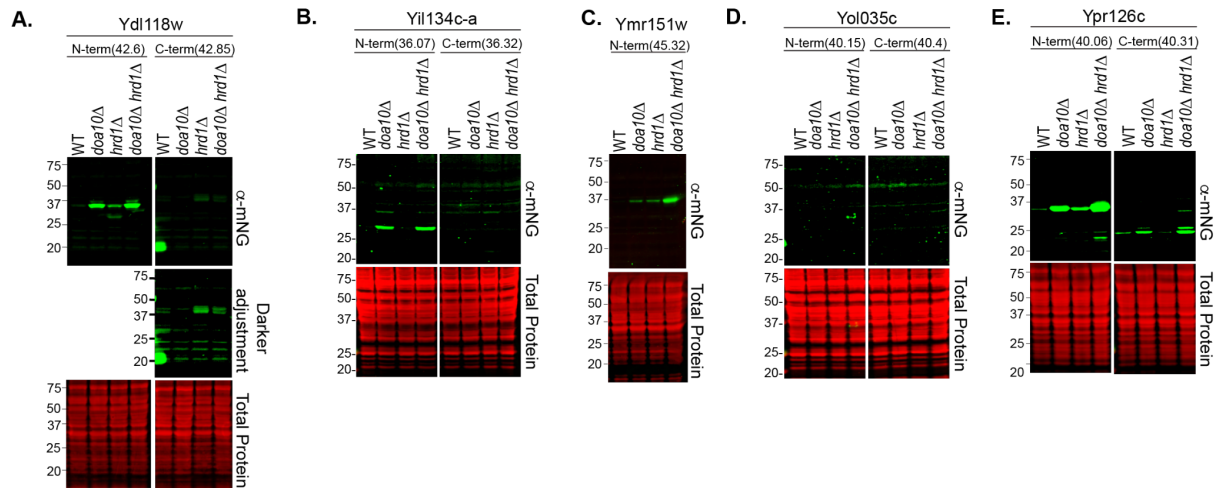

**Figure S6. ER BEPs are stabilized by loss of ER PQC factors Doa10 and/or Hrd1 (accompanies Figure 5).**

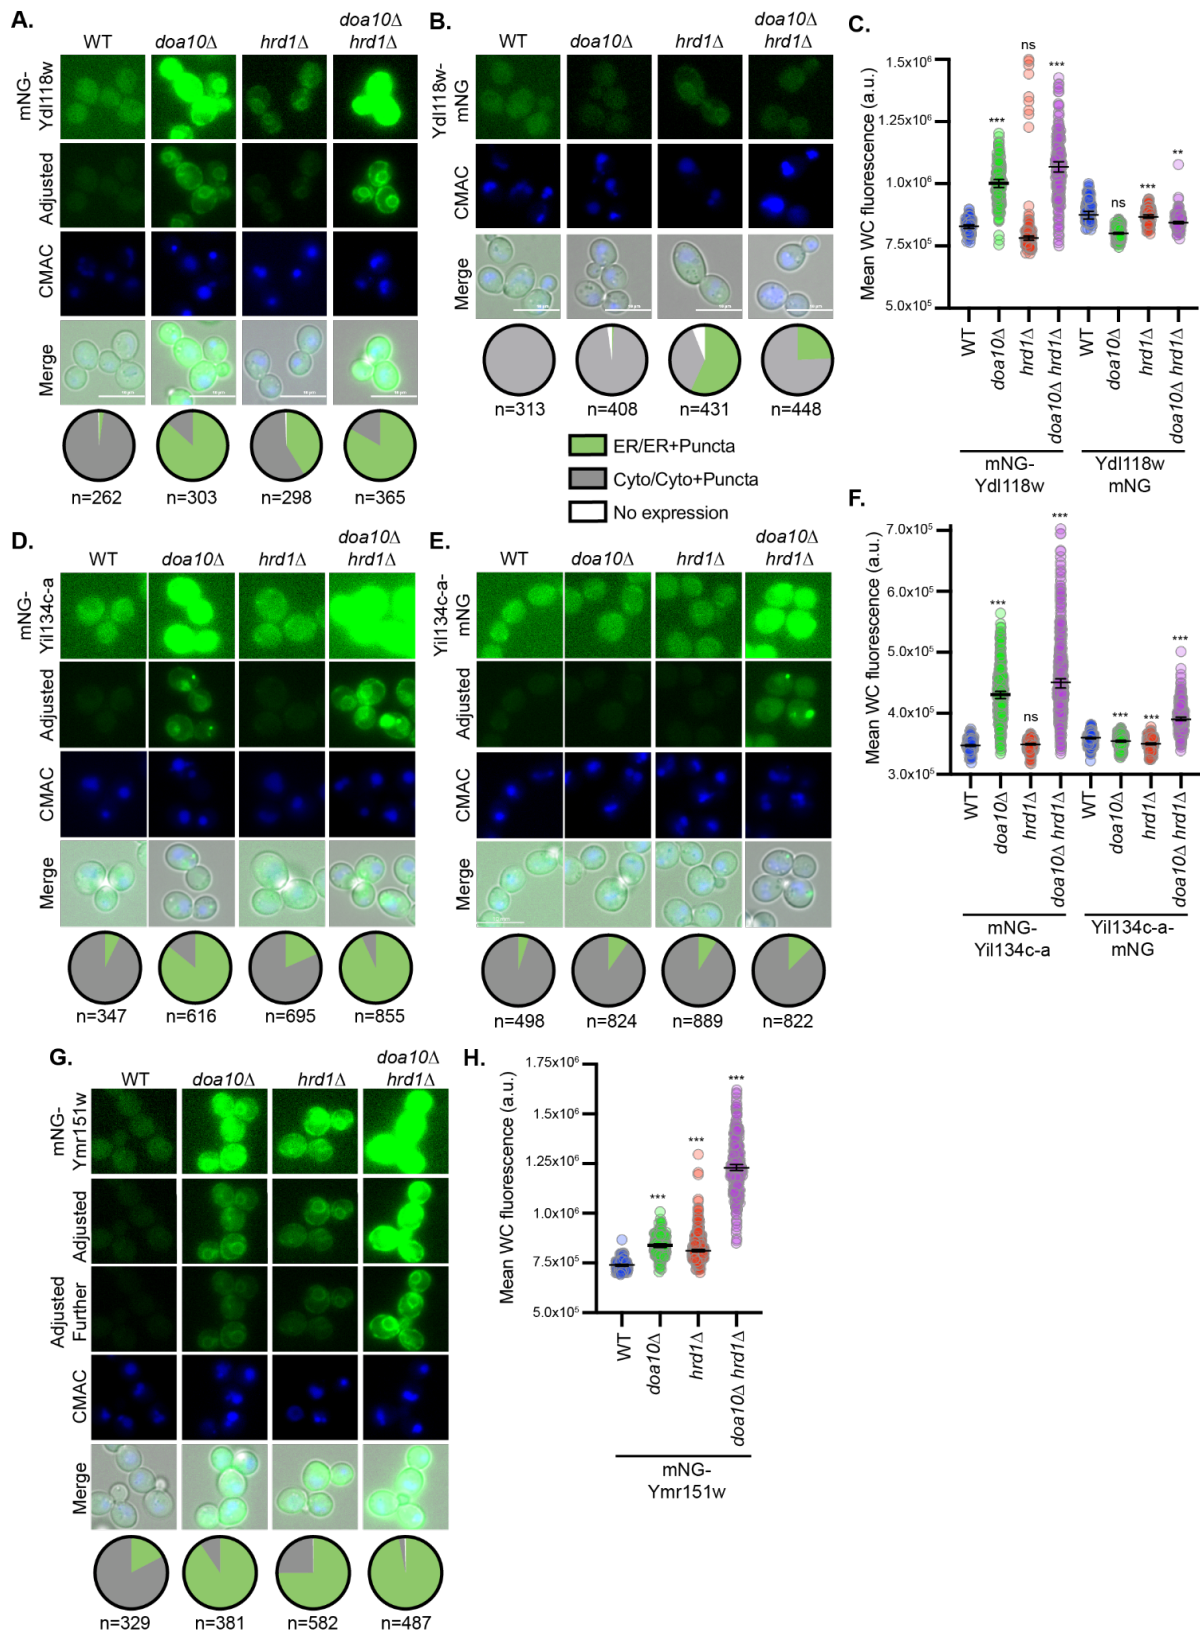

**Figure S7. ER BEPs increase in abundance when ER PQC factors are lost (accompanies Figure 6).**

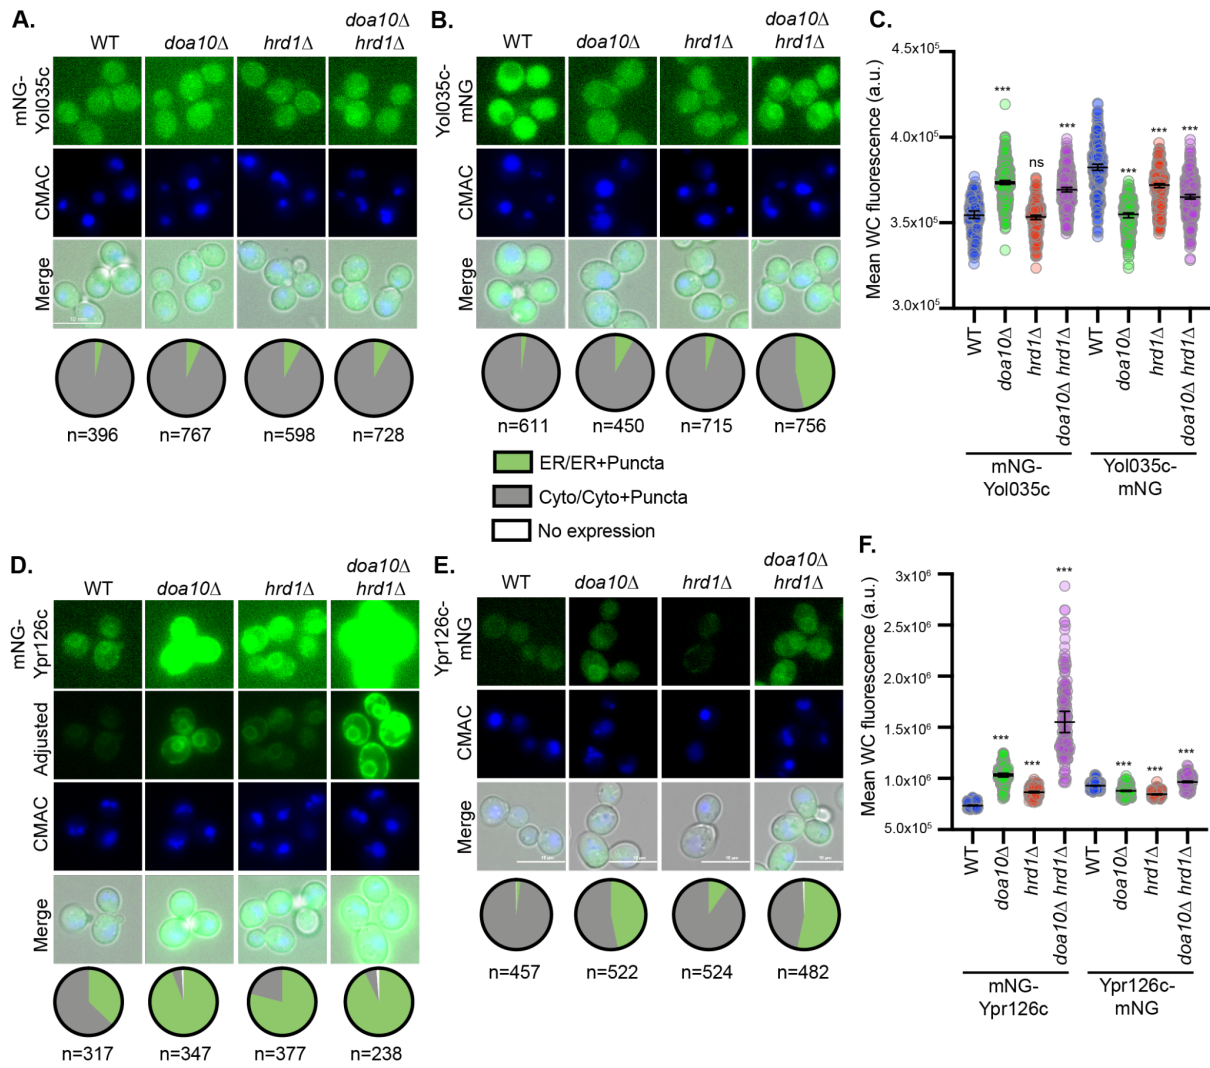

**Figure S8. ER BEPs increase in abundance when ER PQC factors are lost (accompanies Figure 6).**



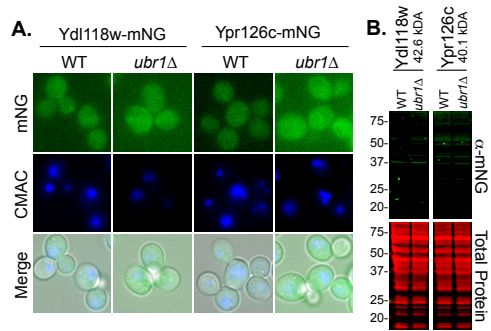

**Figure S9. Loss of Ubr1 does not improve ER localization or abundance of BEPs (accompanies Figure 6).**

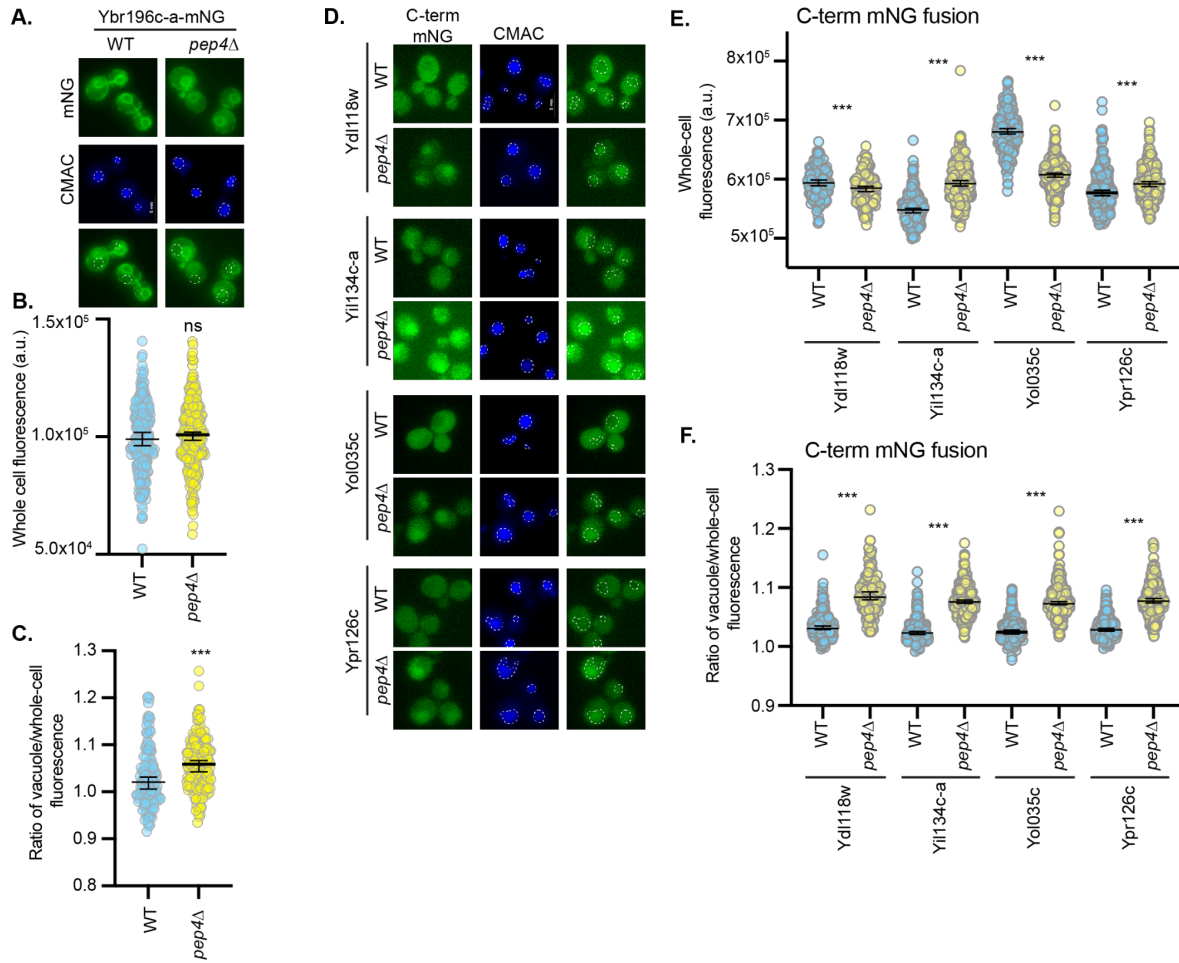

**Figure S10. BEPs are stabilized by loss of vacuolar proteases (accompanies Figure 7).**
